# Supplementary material
Source: PubMed Central journal article supplement (PMC4815513)
Supplement: hdy2014109x1.pdf [file hdy2014109x1.pdf]

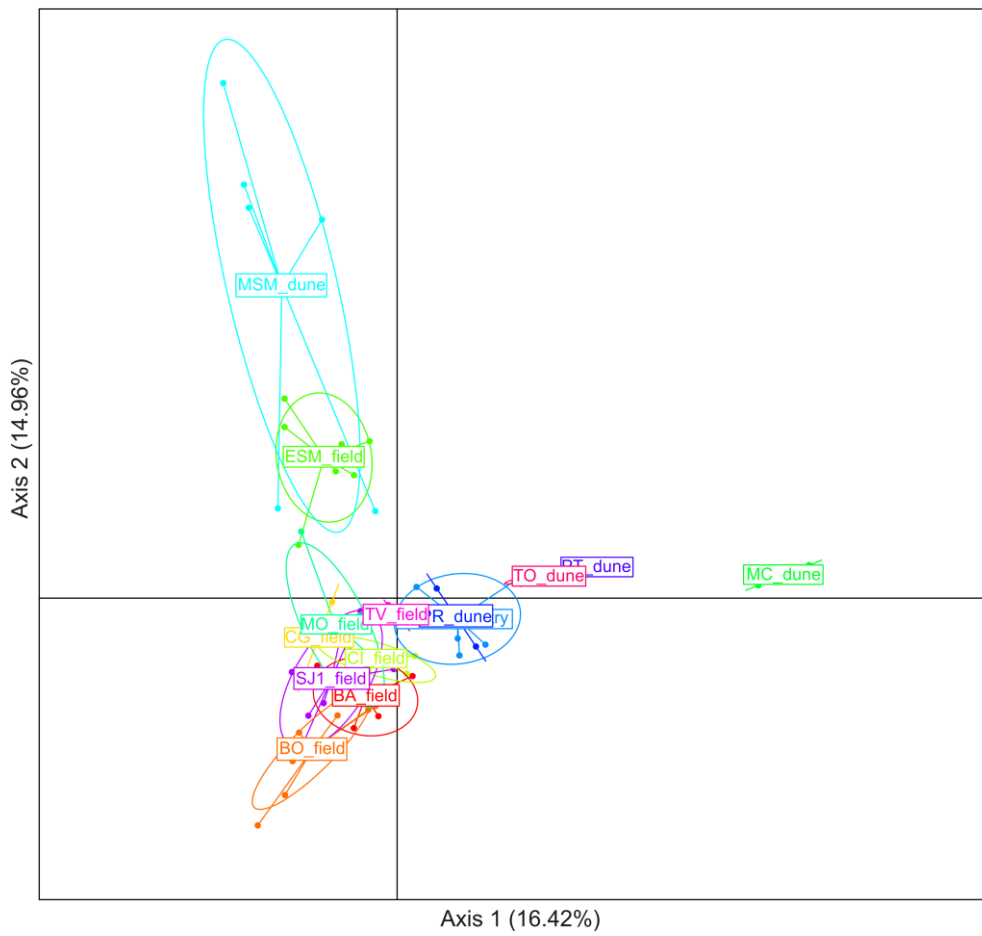

Figure S1. Plot of between-class analysis for the samples of *C. minutus* by sampling site. Locality abbreviations correspond to those in Table 1.

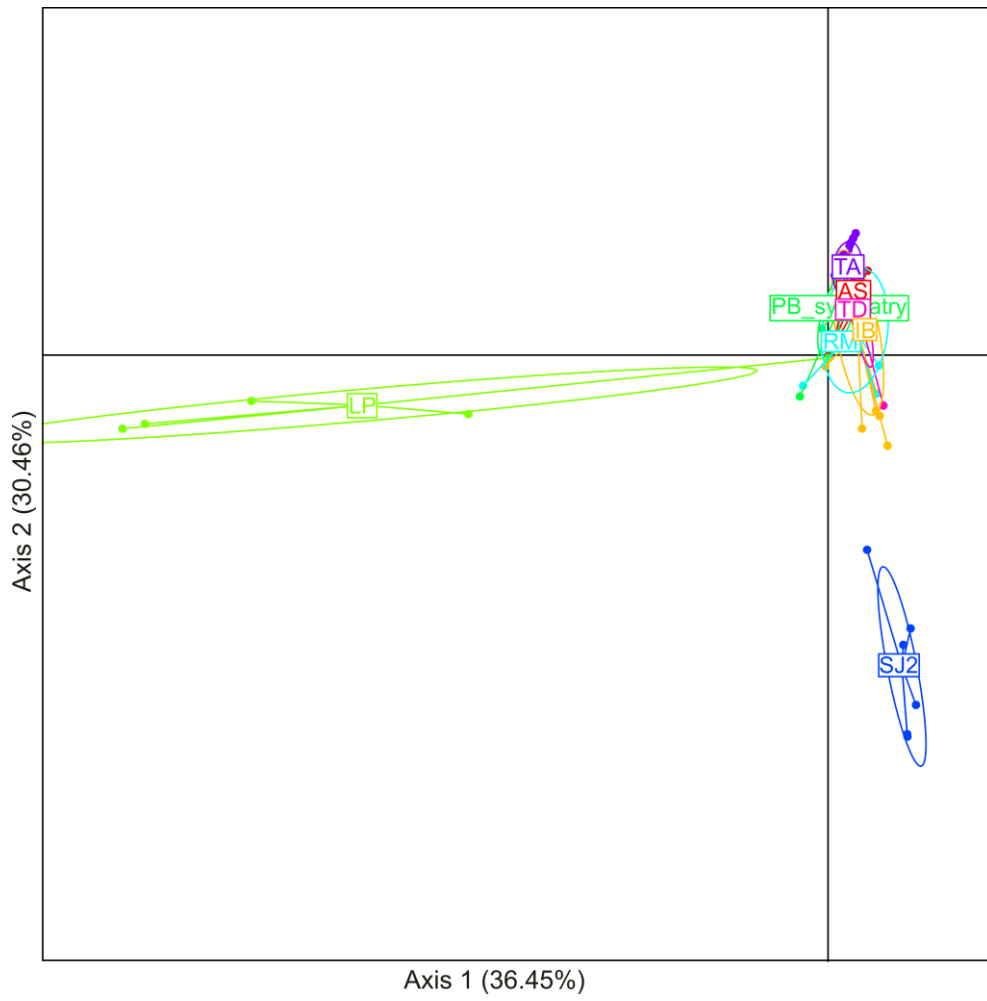

Figure S2. Plot of between-class analysis for the samples of *C. flamarioni* by sampling site. Locality abbreviations correspond to those in Table 1.

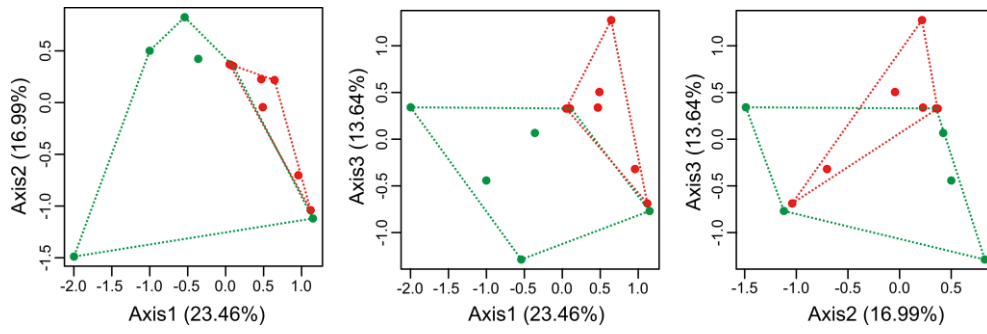

Figure S3. Plots of correspondence analysis for the samples of *C. minutus* (green dots) and *C. flamarioni* (red dots) collected in the sympatric region.

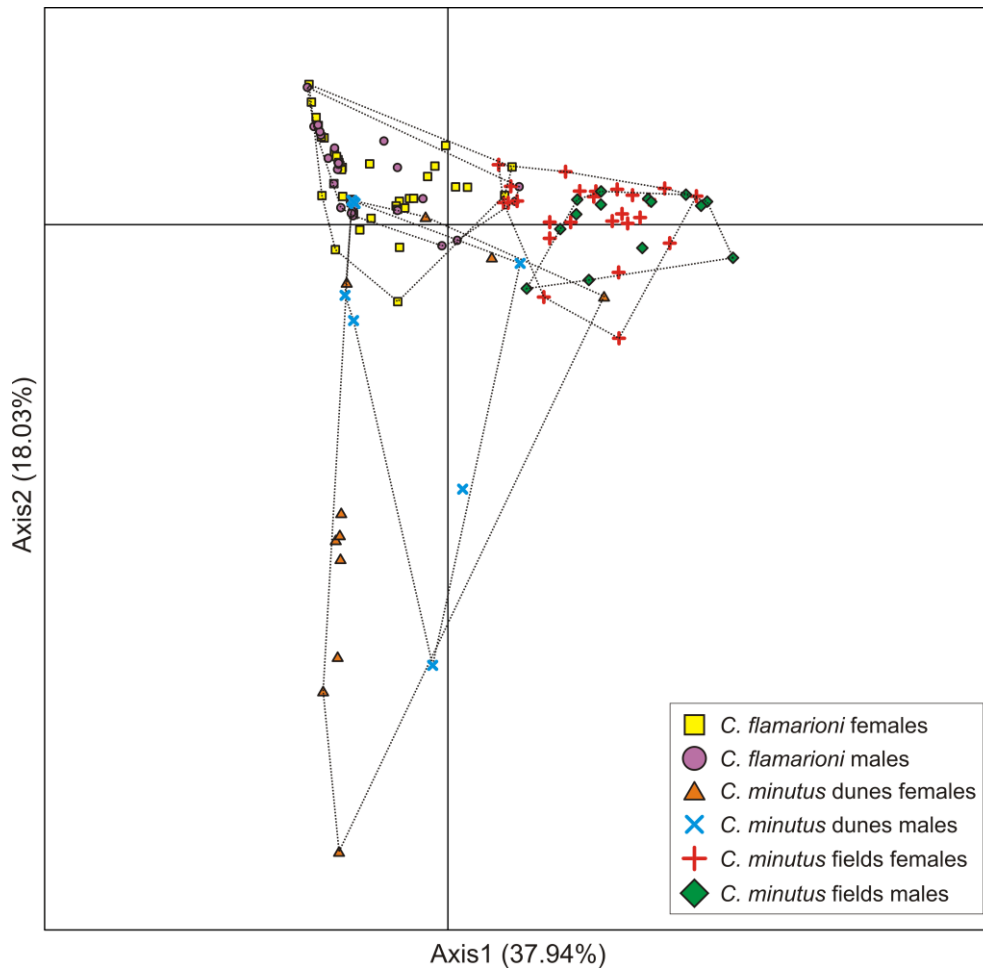

FigureS4. Plot of between-class analysis for samples of male and female individuals for each species in different habitats.
