# Supplementary material
Source: PubMed Central journal article supplement (PMC4815513)
Supplement: hdy2014109x2.pdf [file hdy2014109x2.pdf]

Table S1. List of plant species sequenced to construct the reference databases of the P6 loop of the chloroplast *trnL* (UAA) intron, and the first internal transcribed spacer (ITS1) of nuclear ribosomal DNA of Asteraceae and Poaceae plant families.

| <b>Plant ID</b> | <b>Species</b>                  | <b>Family</b> |
|-----------------|---------------------------------|---------------|
| P047            | <i>Blutaparon portulacoides</i> | Amaranthaceae |
| P056            | <i>Blutaparon portulacoides</i> | Amaranthaceae |
| P077            | <i>Blutaparon portulacoides</i> | Amaranthaceae |
| P122            | <i>Blutaparon portulacoides</i> | Amaranthaceae |
| P070            | <i>Chenopodium retusum</i>      | Amaranthaceae |
| P232            | <i>Gomphrena perennis</i>       | Amaranthaceae |
| P147            | <i>Centella asiatica</i>        | Apiaceae      |
| P218            | <i>Eryngium sanguisorba</i>     | Apiaceae      |
| P210            | <i>Mandevilla pinifolia</i>     | Apocynaceae   |
| P226            | <i>Oxypetalum arnottianum</i>   | Apocynaceae   |
| P028            | <i>Oxypetalum tomentosum</i>    | Apocynaceae   |
| P141            | <i>Oxypetalum tomentosum</i>    | Apocynaceae   |
| P008            | <i>Hydrocotyle bonariensis</i>  | Araliaceae    |
| P039            | <i>Hydrocotyle bonariensis</i>  | Araliaceae    |
| P049            | <i>Hydrocotyle bonariensis</i>  | Araliaceae    |
| P069            | <i>Hydrocotyle bonariensis</i>  | Araliaceae    |
| P118            | <i>Hydrocotyle bonariensis</i>  | Araliaceae    |
| P061            | <i>Acanthospermum australe</i>  | Asteraceae    |
| P200            | <i>Baccharis genistelloides</i> | Asteraceae    |
| P095            | <i>Baccharis gnaphalioides</i>  | Asteraceae    |
| P127            | <i>Baccharis gnaphalioides</i>  | Asteraceae    |
| P238            | <i>Baccharis leucopappa</i>     | Asteraceae    |
| P237            | <i>Baccharis megapotamica</i>   | Asteraceae    |
| P209            | <i>Chaptalia sinuata</i>        | Asteraceae    |
| P115            | <i>Conyza blakei</i>            | Asteraceae    |
| P172            | <i>Conyza primulifolia</i>      | Asteraceae    |
| P199            | <i>Eupatorium ascendens</i>     | Asteraceae    |
| P062            | <i>Gamochaeta americana</i>     | Asteraceae    |
| P117            | <i>Gamochaeta americana</i>     | Asteraceae    |
| P121            | <i>Gamochaeta americana</i>     | Asteraceae    |
| P126            | <i>Gamochaeta americana</i>     | Asteraceae    |
| P032            | <i>Gamochaeta falcata</i>       | Asteraceae    |
| P034            | <i>Gamochaeta falcata</i>       | Asteraceae    |
| P072            | <i>Gamochaeta subfalcata</i>    | Asteraceae    |
| P203            | <i>Lucilia acutifolia</i>       | Asteraceae    |
| P202            | <i>Lucilia nitens</i>           | Asteraceae    |
| P065            | <i>Noticastrum calvatum</i>     | Asteraceae    |
| P094            | <i>Noticastrum calvatum</i>     | Asteraceae    |

|      |                                    |                 |
|------|------------------------------------|-----------------|
| P205 | <i>Noticastrum gnaphalioides</i>   | Asteraceae      |
| P206 | <i>Orthopappus angustifolius</i>   | Asteraceae      |
| P168 | <i>Pluchea oblongifolia</i>        | Asteraceae      |
| P178 | <i>Pterocaulon angustifolium</i>   | Asteraceae      |
| P208 | <i>Pterocaulon lorentzii</i>       | Asteraceae      |
| P204 | <i>Senecio brasiliensis</i>        | Asteraceae      |
| P007 | <i>Senecio ceratophylloides</i>    | Asteraceae      |
| P031 | <i>Senecio ceratophylloides</i>    | Asteraceae      |
| P052 | <i>Senecio ceratophylloides</i>    | Asteraceae      |
| P063 | <i>Senecio ceratophylloides</i>    | Asteraceae      |
| P105 | <i>Senecio ceratophylloides</i>    | Asteraceae      |
| P128 | <i>Senecio ceratophylloides</i>    | Asteraceae      |
| P024 | <i>Soliva pterosperma</i>          | Asteraceae      |
| P201 | <i>Sommerfeltia spinulosa</i>      | Asteraceae      |
| P207 | <i>Stenachaenium megapotamicum</i> | Asteraceae      |
| P030 | <i>Tagetes minuta</i>              | Asteraceae      |
| P096 | <i>Varronia curassavica</i>        | Boraginaceae    |
| P133 | <i>Varronia curassavica</i>        | Boraginaceae    |
| P075 | <i>Acicarpa procumbens</i>         | Calyceraceae    |
| P229 | <i>Wahlenbergia linarioides</i>    | Campanulaceae   |
| P043 | <i>Cardionema ramosissimum</i>     | Caryophyllaceae |
| P088 | <i>Cardionema ramosissimum</i>     | Caryophyllaceae |
| P097 | <i>Cardionema ramosissimum</i>     | Caryophyllaceae |
| P092 | <i>Polycarpon tetraphyllum</i>     | Caryophyllaceae |
| P224 | <i>Helianthemum brasiliense</i>    | Cistaceae       |
| P185 | <i>Bulbostylis capillaris</i>      | Cyperaceae      |
| P196 | <i>Bulbostylis juncooides</i>      | Cyperaceae      |
| P198 | <i>Carex phalaroides</i>           | Cyperaceae      |
| P100 | <i>Cyperus aggregatus</i>          | Cyperaceae      |
| P194 | <i>Cyperus hermaphroditus</i>      | Cyperaceae      |
| P184 | <i>Cyperus reflexus</i>            | Cyperaceae      |
| P191 | <i>Eleocharis flavescens</i>       | Cyperaceae      |
| P192 | <i>Eleocharis maculosa</i>         | Cyperaceae      |
| P189 | <i>Fimbristylis autumnalis</i>     | Cyperaceae      |
| P197 | <i>Fimbristylis spadicea</i>       | Cyperaceae      |
| P195 | <i>Kyllinga odorata</i>            | Cyperaceae      |
| P188 | <i>Rhynchospora barrosiana</i>     | Cyperaceae      |
| P187 | <i>Rhynchospora brittonii</i>      | Cyperaceae      |
| P186 | <i>Rhynchospora tenuis</i>         | Cyperaceae      |
| P216 | <i>Croton lanatus</i>              | Euphorbiaceae   |
| P180 | <i>Aeschynomene falcata</i>        | Fabaceae        |
| P243 | <i>Aeschynomene falcata</i>        | Fabaceae        |
| P236 | <i>Chamaecrista nictitans</i>      | Fabaceae        |
| P027 | <i>Desmodium incanum</i>           | Fabaceae        |
| P073 | <i>Desmodium incanum</i>           | Fabaceae        |
| P124 | <i>Desmodium incanum</i>           | Fabaceae        |
| P025 | <i>Lathyrus crassipes</i>          | Fabaceae        |
| P234 | <i>Macroptilium psammodes</i>      | Fabaceae        |
| P235 | <i>Sesbania punicea</i>            | Fabaceae        |
| P245 | <i>Stylosanthes viscosa</i>        | Fabaceae        |
| P173 | <i>Vigna luteola</i>               | Fabaceae        |

|      |                                       |                 |
|------|---------------------------------------|-----------------|
| P233 | <i>Zornia reticulata</i>              | Fabaceae        |
| P017 | <i>Hypoxis decumbens</i>              | Hypoxidaceae    |
| P022 | <i>Hypoxis decumbens</i>              | Hypoxidaceae    |
| P219 | <i>Sisyrinchium micranthum</i>        | Iridaceae       |
| P220 | <i>Sisyrinchium palmifolium</i>       | Iridaceae       |
| P111 | <i>Juncus kraussii</i>                | Juncaceae       |
| P193 | <i>Juncus microcephalus</i>           | Juncaceae       |
| P019 | <i>Juncus tenuis</i>                  | Juncaceae       |
| P174 | <i>Cuphea carthagenensis</i>          | Lythraceae      |
| P227 | <i>Cuphea glutinosa</i>               | Lythraceae      |
| P183 | <i>Tibouchina gracilis</i>            | Melastomataceae |
| P222 | <i>Tibouchina gracilis</i>            | Melastomataceae |
| P221 | <i>Tibouchina versicolor</i>          | Melastomataceae |
| P037 | <i>Oenothera parodiana</i>            | Onagraceae      |
| P134 | <i>Oenothera parodiana</i>            | Onagraceae      |
| P130 | <i>Pelexia bonariensis</i>            | Orchidaceae     |
| P175 | <i>Agalinis communis</i>              | Orobanchaceae   |
| P080 | <i>Bacopa monnieri</i>                | Plantaginaceae  |
| P225 | <i>Mecardonia tenella</i>             | Plantaginaceae  |
| P074 | <i>Plantago tomentosa</i>             | Plantaginaceae  |
| P104 | <i>Plantago tomentosa</i>             | Plantaginaceae  |
| P171 | <i>Agrostis montevidensis</i>         | Poaceae         |
| P090 | <i>Andropogon arenarius</i>           | Poaceae         |
| P119 | <i>Andropogon arenarius</i>           | Poaceae         |
| P138 | <i>Andropogon arenarius</i>           | Poaceae         |
| P179 | <i>Andropogon lateralis</i>           | Poaceae         |
| P239 | <i>Andropogon selloanus</i>           | Poaceae         |
| P267 | <i>Aristida circinalis</i>            | Poaceae         |
| P255 | <i>Aristida jubata</i>                | Poaceae         |
| P254 | <i>Aristida laevis</i>                | Poaceae         |
| P268 | <i>Aristida laevis</i>                | Poaceae         |
| P162 | <i>Axonopus fissifolius</i>           | Poaceae         |
| P260 | <i>Axonopus sp.</i>                   | Poaceae         |
| P038 | <i>Briza subaristata</i>              | Poaceae         |
| P256 | <i>Briza subaristata</i>              | Poaceae         |
| P247 | <i>Calamagrostis viridiflavescens</i> | Poaceae         |
| P060 | <i>Cenchrus echinatus</i>             | Poaceae         |
| P114 | <i>Cenchrus echinatus</i>             | Poaceae         |
| P145 | <i>Cenchrus echinatus</i>             | Poaceae         |
| P098 | <i>Chascolytrum erectum</i>           | Poaceae         |
| P242 | <i>Digitaria connivens</i>            | Poaceae         |
| P064 | <i>Digitaria eriantha</i>             | Poaceae         |
| P253 | <i>Eleusine tristachya</i>            | Poaceae         |
| P262 | <i>Elionurus muticus</i>              | Poaceae         |
| P252 | <i>Eragrostis lugens</i>              | Poaceae         |
| P230 | <i>Eragrostis neesii</i>              | Poaceae         |
| P018 | <i>Eragrostis plana</i>               | Poaceae         |
| P125 | <i>Eragrostis trichocolea</i>         | Poaceae         |
| P269 | <i>Eragrostis trichocolea</i>         | Poaceae         |
| P116 | <i>Gymnopogon legrandii</i>           | Poaceae         |
| P148 | <i>Gymnopogon legrandii</i>           | Poaceae         |

|      |                                    |              |
|------|------------------------------------|--------------|
| P099 | <i>Imperata brasiliensis</i>       | Poaceae      |
| P149 | <i>Imperata brasiliensis</i>       | Poaceae      |
| P264 | <i>Ischaemum minus</i>             | Poaceae      |
| P257 | <i>Melica rigida</i>               | Poaceae      |
| P246 | <i>Melinis repens</i>              | Poaceae      |
| P161 | <i>Panicum aquaticum</i>           | Poaceae      |
| P009 | <i>Panicum racemosum</i>           | Poaceae      |
| P010 | <i>Panicum racemosum</i>           | Poaceae      |
| P012 | <i>Panicum racemosum</i>           | Poaceae      |
| P050 | <i>Panicum racemosum</i>           | Poaceae      |
| P079 | <i>Panicum racemosum</i>           | Poaceae      |
| P029 | <i>Paspalum arenarium</i>          | Poaceae      |
| P103 | <i>Paspalum arenarium</i>          | Poaceae      |
| P143 | <i>Paspalum arenarium</i>          | Poaceae      |
| P177 | <i>Paspalum dilatatum</i>          | Poaceae      |
| P249 | <i>Paspalum distichum</i>          | Poaceae      |
| P164 | <i>Paspalum leptum</i>             | Poaceae      |
| P167 | <i>Paspalum leptum</i>             | Poaceae      |
| P091 | <i>Paspalum leptum</i>             | Poaceae      |
| P266 | <i>Paspalum notatum</i>            | Poaceae      |
| P261 | <i>Paspalum pauciciliatum</i>      | Poaceae      |
| P163 | <i>Paspalum plicatulum</i>         | Poaceae      |
| P003 | <i>Piptochaetium montevidense</i>  | Poaceae      |
| P258 | <i>Piptochaetium montevidense</i>  | Poaceae      |
| P144 | <i>Schizachyrium microstachyum</i> | Poaceae      |
| P089 | <i>Setaria parviflora</i>          | Poaceae      |
| P101 | <i>Setaria parviflora</i>          | Poaceae      |
| P160 | <i>Sorghastrum setosum</i>         | Poaceae      |
| P078 | <i>Spartina densiflora</i>         | Poaceae      |
| P240 | <i>Sporobolus indicus</i>          | Poaceae      |
| P250 | <i>Sporobolus jacquemontii</i>     | Poaceae      |
| P166 | <i>Stenotaphrum secundatum</i>     | Poaceae      |
| P181 | <i>Urochloa arrecta</i>            | Poaceae      |
| P071 | <i>Polygala cyparissias</i>        | Polygalaceae |
| P112 | <i>Polygala cyparissias</i>        | Polygalaceae |
| P142 | <i>Polygala cyparissias</i>        | Polygalaceae |
| P170 | <i>Polygala linoides</i>           | Polygalaceae |
| P215 | <i>Borreria eryngioides</i>        | Rubiaceae    |
| P176 | <i>Galium richardianum</i>         | Rubiaceae    |
| P212 | <i>Hedyotis verticillata</i>       | Rubiaceae    |
| P066 | <i>Richardia brasiliensis</i>      | Rubiaceae    |
| P213 | <i>Richardia humistrata</i>        | Rubiaceae    |
| P211 | <i>Richardia stellaris</i>         | Rubiaceae    |
| P214 | <i>Spermacoce capitata</i>         | Rubiaceae    |
| P228 | <i>Smilax cognata</i>              | Smilacaceae  |
| P068 | <i>Petunia integrifolia</i>        | Solanaceae   |
| P011 | <i>Solanum americanum</i>          | Solanaceae   |
| P081 | <i>Solanum americanum</i>          | Solanaceae   |
| P021 | <i>Solanum commersonii</i>         | Solanaceae   |
| P169 | <i>Solanum glaucophyllum</i>       | Solanaceae   |
| P059 | <i>Glandularia selloi</i>          | Verbenaceae  |

|      |                           |             |
|------|---------------------------|-------------|
| P102 | <i>Glandularia selloi</i> | Verbenaceae |
| P131 | <i>Glandularia selloi</i> | Verbenaceae |
| P084 | <i>Phyla canescens</i>    | Verbenaceae |
| P109 | <i>Phyla canescens</i>    | Verbenaceae |

---

Table S2. Proportion of samples, in each habitat/region and species category, presenting in their diet composition at least one sequence identified in the Asteraceae family for the ITS1 molecular marker. The taxonomic identification and the best match sequence identifier from GenBank are shown for each sequence obtained. The number of samples for each category is within parentheses.

| Sequence ID | Taxonomic identification |                                  | Best match | <i>C. minutus</i> |                 |                  | <i>C. flamarioni</i> |                |                  |                      |
|-------------|--------------------------|----------------------------------|------------|-------------------|-----------------|------------------|----------------------|----------------|------------------|----------------------|
|             | Genus                    | Species                          |            | Dunes (n = 9)     | Fields (n = 10) | Sympatry (n = 1) | All samples (n = 20) | Dunes (n = 13) | Sympatry (n = 2) | All samples (n = 15) |
| ast_0047    | <i>Ambrosia</i>          | <i>Ambrosia artemisiifolia</i>   | EF065542   | -                 | 30%             | -                | 15%                  | 7.69%          | -                | 6.67%                |
| ast_0065    | <i>Ambrosia</i>          | <i>Ambrosia artemisiifolia</i>   | EF065542   | -                 | 30%             | -                | 15%                  | 7.69%          | -                | 6.67%                |
| ast_0026    | <i>Baccharis</i>         | <i>Baccharis genistelloides</i>  | P200       | 11.11%            | 20%             | 100%             | 20%                  | -              | -                | -                    |
| ast_0073    | <i>Baccharis</i>         | <i>Baccharis leucopappa</i>      | P238       | 11.11%            | 20%             | 100%             | 20%                  | -              | -                | -                    |
| ast_0020    | <i>Conyza</i>            | <i>Conyza primulifolia</i>       | P172       | -                 | 20%             | -                | 10%                  | -              | -                | -                    |
| ast_0112    | <i>Conyza</i>            | <i>Conyza bonariensis</i>        | AY875696   | -                 | 20%             | -                | 10%                  | -              | -                | -                    |
| ast_0046    | <i>Erigeron</i>          | <i>Erigeron thunbergii</i>       | AB250274   | -                 | 10%             | -                | 5%                   | -              | -                | -                    |
| ast_0010    | <i>Hypochaeris</i>       | NA                               | AF528452   | -                 | -               | -                | -                    | 7.69%          | -                | 6.67%                |
| ast_0001    | <i>Pterocaulon</i>       | <i>Pterocaulon angustifolium</i> | P178       | 22.22%            | 10%             | -                | 15%                  | -              | -                | -                    |
| ast_0103    | <i>Pterocaulon</i>       | <i>Pterocaulon lorentzii</i>     | P208       | 22.22%            | 10%             | -                | 15%                  | -              | -                | -                    |
| ast_0002    | <i>Senecio</i>           | NA                               | EF538299   | -                 | -               | -                | -                    | -              | -                | -                    |
| ast_0008    | <i>Senecio</i>           | NA                               | EF538299   | 77.78%            | -               | 100%             | 40%                  | 84.62%         | 100%             | 86.67%               |
| ast_0025    | <i>Senecio</i>           | NA                               | AF457434   | -                 | -               | -                | -                    | -              | -                | -                    |

|          |                     |                               |          |        |     |   |     |        |     |        |
|----------|---------------------|-------------------------------|----------|--------|-----|---|-----|--------|-----|--------|
| ast_0052 | <i>Senecio</i>      | NA                            | EF538299 |        |     |   |     |        |     |        |
| ast_0051 | <i>Sommerfeltia</i> | <i>Sommerfeltia spinulosa</i> | DQ479039 | 11.11% | -   | - | 5%  | -      | -   | -      |
| ast_0012 | NA                  | NA                            | EF538299 |        |     |   |     |        |     |        |
| ast_0019 | NA                  | NA                            | AF118513 |        |     |   |     |        |     |        |
| ast_0035 | NA                  | NA                            | DQ478975 |        |     |   |     |        |     |        |
| ast_0037 | NA                  | NA                            | AF046968 |        |     |   |     |        |     |        |
| ast_0063 | NA                  | NA                            | AF115917 | 33.33% | 80% | - | 55% | 30.77% | 50% | 33.33% |
| ast_0064 | NA                  | NA                            | AB250266 |        |     |   |     |        |     |        |
| ast_0077 | NA                  | NA                            | AB250266 |        |     |   |     |        |     |        |
| ast_0279 | NA                  | NA                            | AB095080 |        |     |   |     |        |     |        |
| ast_1115 | NA                  | NA                            | DQ478975 |        |     |   |     |        |     |        |

---

Table S3. Proportion of samples in each habitat/region and species category, presenting in their diet composition at least one sequence identified in the Poaceae family for the ITS1 molecular marker. The taxonomic identification and the best match sequence identifier from GenBank are shown for each sequence obtained. The number of samples for each category is within parentheses.

| Sequence ID | Taxonomic identification |                                | Best match | <i>C. minutus</i> |                 |                  |                      | <i>C. flamarioni</i> |                   |                      |
|-------------|--------------------------|--------------------------------|------------|-------------------|-----------------|------------------|----------------------|----------------------|-------------------|----------------------|
|             | Genus                    | Species                        |            | Dunes (n = 21)    | Fields (n = 35) | Sympatry (n = 6) | All samples (n = 62) | Dunes (n = 83)       | Sympatry (n = 13) | All samples (n = 96) |
| poa_0032    | <i>Andropogon</i>        | NA                             | P179       | 9.52%             | 2.86%           | 33.33%           | 8.06%                | -                    | -                 | -                    |
| poa_0004    | <i>Axonopus</i>          | <i>Axonopus fissifolius</i>    | P162       |                   |                 |                  |                      |                      |                   |                      |
| poa_0057    | <i>Axonopus</i>          | <i>Axonopus fissifolius</i>    | P162       | -                 | 68.57%          | 66.67%           | 45.16%               | 9.64%                | -                 | 8.33%                |
| poa_0084    | <i>Axonopus</i>          | <i>Axonopus fissifolius</i>    | P162       |                   |                 |                  |                      |                      |                   |                      |
| poa_0024    | <i>Centrochloa</i>       | <i>Centrochloa singularis</i>  | JQ320293   | -                 | 2.86%           | -                | 1.61%                | -                    | -                 | -                    |
| poa_0010    | <i>Digitaria</i>         | <i>Digitaria connivens</i>     | P242       | 19.05%            | 8.57%           | -                | 11.29%               | 14.46%               | -                 | 12.50%               |
| poa_0143    | <i>Digitaria</i>         | <i>Digitaria connivens</i>     | P242       |                   |                 |                  |                      |                      |                   |                      |
| poa_0018    | <i>Eragrostis</i>        | NA                             | GU359287   | 14.29%            | 2.86%           | -                | 6.45%                | 1.20%                | -                 | 1.04%                |
| poa_0841    | <i>Eragrostis</i>        | NA                             | AM901000   |                   |                 |                  |                      |                      |                   |                      |
| poa_0235    | <i>Gymnopogon</i>        | <i>Gymnopogon grandiflorus</i> | GU359200   | -                 | -               | 16.67%           | 1.61%                | 1.20%                | -                 | 1.04%                |
| poa_0133    | <i>Imperata</i>          | <i>Imperata cylindrica</i>     | EU267071   | 4.76%             | -               | -                | 1.61%                | -                    | -                 | -                    |
| poa_0066    | <i>Ischaemum</i>         | <i>Ischaemum minus</i>         | P264       | 14.29%            | 5.71%           | -                | 8.06%                | 2.41%                | -                 | 2.08%                |
| poa_0087    | <i>Ischaemum</i>         | <i>Ischaemum minus</i>         | P264       |                   |                 |                  |                      |                      |                   |                      |



|          |                     |                                |          |        |        |        |        |        |        |        |
|----------|---------------------|--------------------------------|----------|--------|--------|--------|--------|--------|--------|--------|
| poa_0078 | <i>Leersia</i>      | NA                             | AF019793 | -      | 2.86%  | -      | 1.61%  | 2.41%  | -      | 2.08%  |
| poa_0029 | <i>Melinis</i>      | <i>Melinis repens</i>          | AY746595 | -      | 2.86%  | -      | 1.61%  | -      | -      | -      |
| poa_0001 | <i>Panicum</i>      | NA                             | AY129693 |        |        |        |        |        |        |        |
| poa_0007 | <i>Panicum</i>      | <i>Panicum aquaticum</i>       | P161     |        |        |        |        |        |        |        |
| poa_0131 | <i>Panicum</i>      | NA                             | AY129693 |        |        |        |        |        |        |        |
| poa_0141 | <i>Panicum</i>      | NA                             | AY129693 | 85.71% | 5.71%  | 83.33% | 40.32% | 90.36% | 100%   | 91.67% |
| poa_0214 | <i>Panicum</i>      | <i>Panicum aquaticum</i>       | P161     |        |        |        |        |        |        |        |
| poa_0267 | <i>Panicum</i>      | <i>Panicum dichotomiflorum</i> | HQ600503 |        |        |        |        |        |        |        |
| poa_1340 | <i>Panicum</i>      | NA                             | AY129693 |        |        |        |        |        |        |        |
| poa_0002 | <i>Paspalum</i>     | NA                             | P163     |        |        |        |        |        |        |        |
| poa_0003 | <i>Paspalum</i>     | <i>Paspalum notatum</i>        | GQ870170 |        |        |        |        |        |        |        |
| poa_0006 | <i>Paspalum</i>     | NA                             | P163     | 9.52%  | 80%    | 16.67% | 50%    | 7.23%  | 7.69%  | 7.29%  |
| poa_0022 | <i>Paspalum</i>     | NA                             | JQ320297 |        |        |        |        |        |        |        |
| poa_0086 | <i>Paspalum</i>     | NA                             | P163     |        |        |        |        |        |        |        |
| poa_0014 | <i>Setaria</i>      | <i>Setaria parviflora</i>      | AF019831 | -      | 11.43% | -      | 6.45%  | -      | -      | -      |
| poa_0023 | <i>Spartina</i>     | <i>Spartina densiflora</i>     | GU359206 | 4.76%  | -      | -      | 1.16%  | 19.28% | -      | 16.67% |
| poa_0025 | <i>Spartina</i>     | <i>Spartina ciliata</i>        | AF372636 |        |        |        |        |        |        |        |
| poa_0005 | <i>Stenotaphrum</i> | <i>Stenotaphrum secundatum</i> | AF521902 | 28.57% | 28.57% | -      | 25.81% | 3.61%  | -      | 3.13%  |
| poa_0454 | <i>Stenotaphrum</i> | <i>Stenotaphrum secundatum</i> | AF521902 |        |        |        |        |        |        |        |
| poa_0067 | <i>Urochloa</i>     | NA                             | AY346341 | 4.76%  | -      | -      | 1.61%  | -      | -      | -      |
| poa_0013 | NA                  | NA                             | GQ870170 |        |        |        |        |        |        |        |
| poa_0046 | NA                  | NA                             | AF345218 | 9.52%  | 5.71%  | 16.67% | 8.06%  | 15.66% | 30.77% | 17.70% |
| poa_0284 | NA                  | NA                             | AJ301802 |        |        |        |        |        |        |        |
| poa_0802 | NA                  | NA                             | FJ793097 |        |        |        |        |        |        |        |

Table S4. Average distance to the group centroid (ADC) among male and female samples of each habitat/region and species category analyzed, based on betadisper analysis.

|                      | ADC males | ADC females | P value |
|----------------------|-----------|-------------|---------|
| <i>C. minutus</i>    |           |             |         |
| whole dataset        | 0.62      | 0.61        | 0.56    |
| dunes                | 0.53      | 0.57        | 0.68    |
| sand fields          | 0.62      | 0.58        | 0.25    |
| sympatric zone       | 0.47      | 0.49        | 0.95    |
| <i>C. flamarioni</i> |           |             |         |
| whole dataset        | 0.41      | 0.35        | 0.19    |
| sympatric zone       | 0.26      | 0.25        | 0.96    |

Table S5. Number of identical sequences shared between specimens of *C. minutus* and *C. flamarioni* in different habitats/regions.

|                                                | <i>C. minutus</i> Dunes<br>(N.S. = 19) | <i>C. minutus</i> Fields<br>(N.S. = 30) | <i>C. minutus</i> Sympatry<br>(N.S. = 11) | <i>C. flamarioni</i> Dunes<br>(N.S. = 29) | <i>C. flamarioni</i> Sympatry<br>(N.S. = 5) |
|------------------------------------------------|----------------------------------------|-----------------------------------------|-------------------------------------------|-------------------------------------------|---------------------------------------------|
| <i>C. minutus</i> Dunes<br>(N.S. = 19)         | 19                                     |                                         |                                           |                                           |                                             |
| <i>C. minutus</i> Fields<br>(N.S. = 30)        | 10                                     | 30                                      |                                           |                                           |                                             |
| <i>C. minutus</i> Sympatry<br>(N.S. = 11)      | 7                                      | 8                                       | 11                                        |                                           |                                             |
| <i>C. flamarioni</i> Dunes<br>(N.S. = 29)      | 11                                     | 12                                      | 5                                         | 29                                        |                                             |
| <i>C. flamarioni</i><br>Sympatry<br>(N.S. = 5) | 4                                      | 4                                       | 3                                         | 5                                         | 5                                           |

N.S. – Number of different sequences found within each group
